# Supplementary material for: Identification and validation of a poor clinical outcome subtype of primary prostate cancer with Midkine abundance
Source: PubMed Central journal article supplement — Cancer Sci. 2022 Sep 6;113(11):3698–709. doi: 10.1111/cas.15546 (PMC9633304; doi:10.1111/cas.15546), 2022-09-06
Supplement: CAS-113-3698-s001.pdf [file CAS-113-3698-s001.pdf]

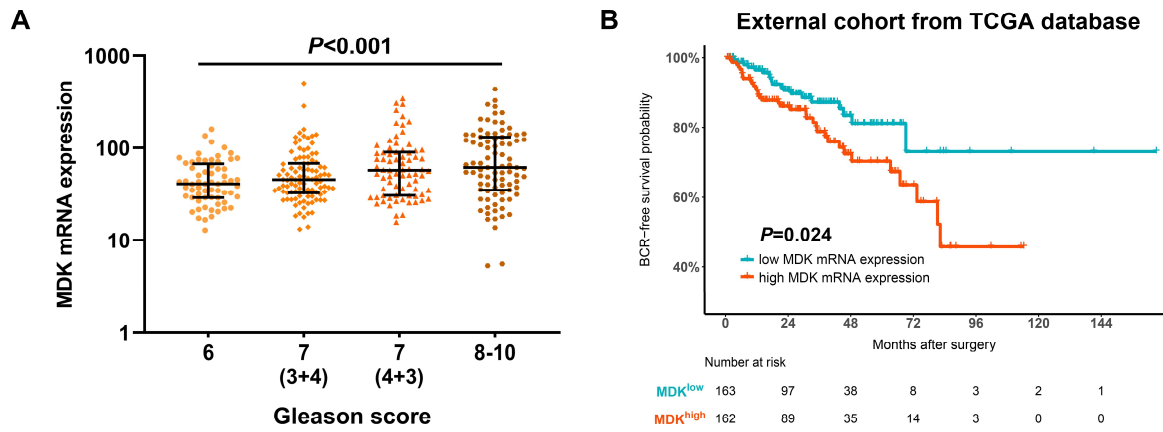

**Supplementary Figure 1. MDK expression correlated with Gleason score and an inferior prognosis in external cohort.**

(A) Comparison of MDK mRNA expression in Gleason score 6, 7 (3+4), 7 (4+3) and 8-10. (B) The Kaplan-Meier curve for BCR-free survival comparing tumor with high vs. low MDK mRNA expression in external cohort (n=325).

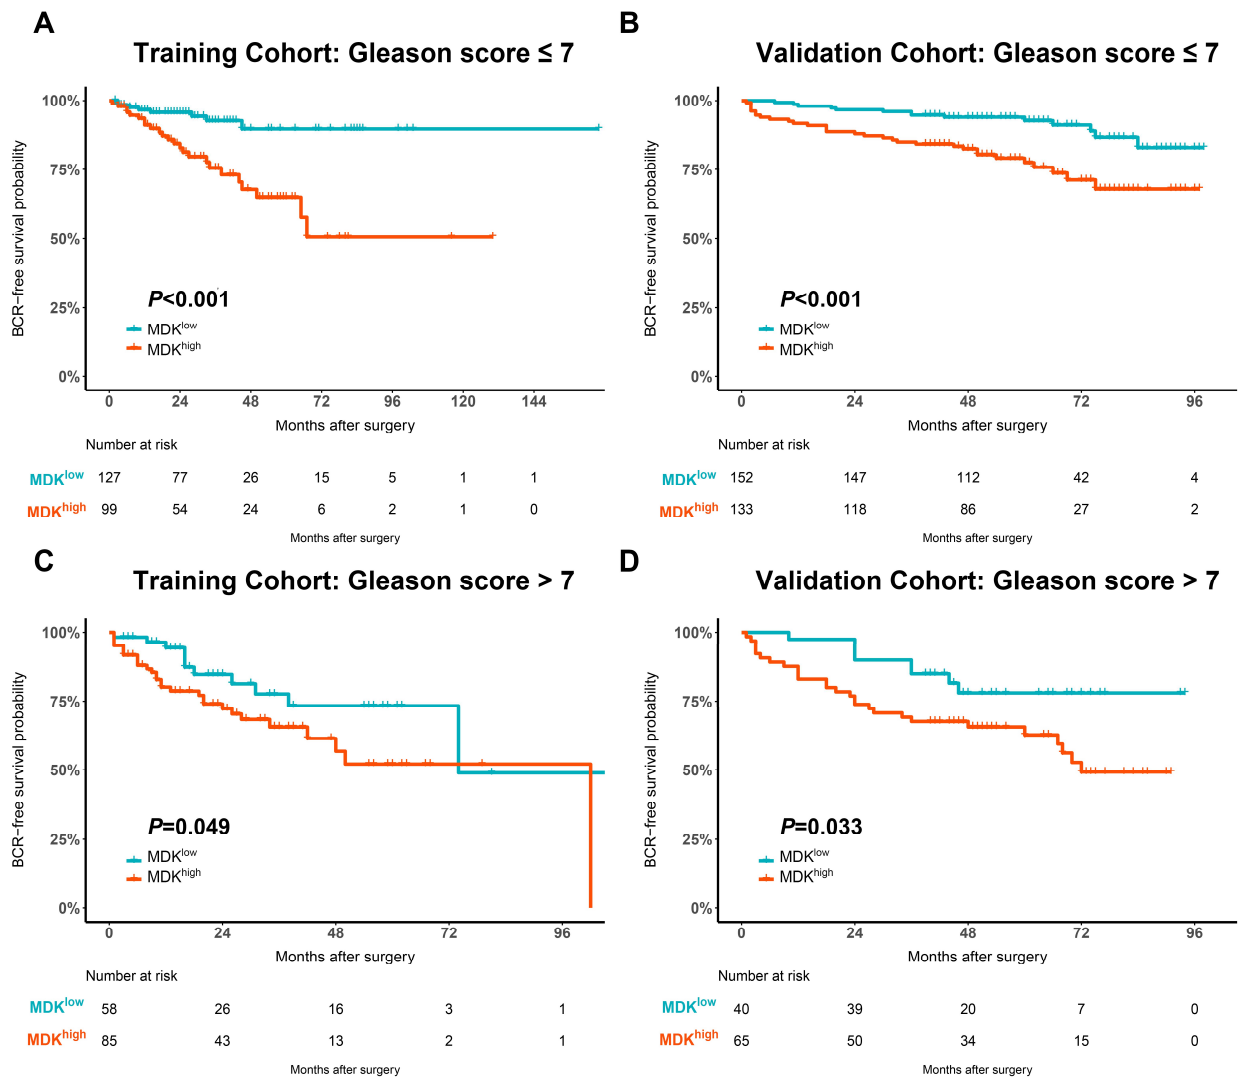

**Supplementary Figure 2. Intratumoral MDK expression was associated with poor prognosis in PCa with Gleason score  $< 7$  or  $\geq 7$  subgroups.**

Kaplan-Meier curves for BCR-free survival comparing tumor with high vs. low intratumoral MDK expression in Gleason score  $< 7$  subgroups in training cohort (A) and validation cohort (B) or in Gleason score  $\geq 7$  subgroups in training cohort (C) and validation cohort (D). Log-rank P values were shown.

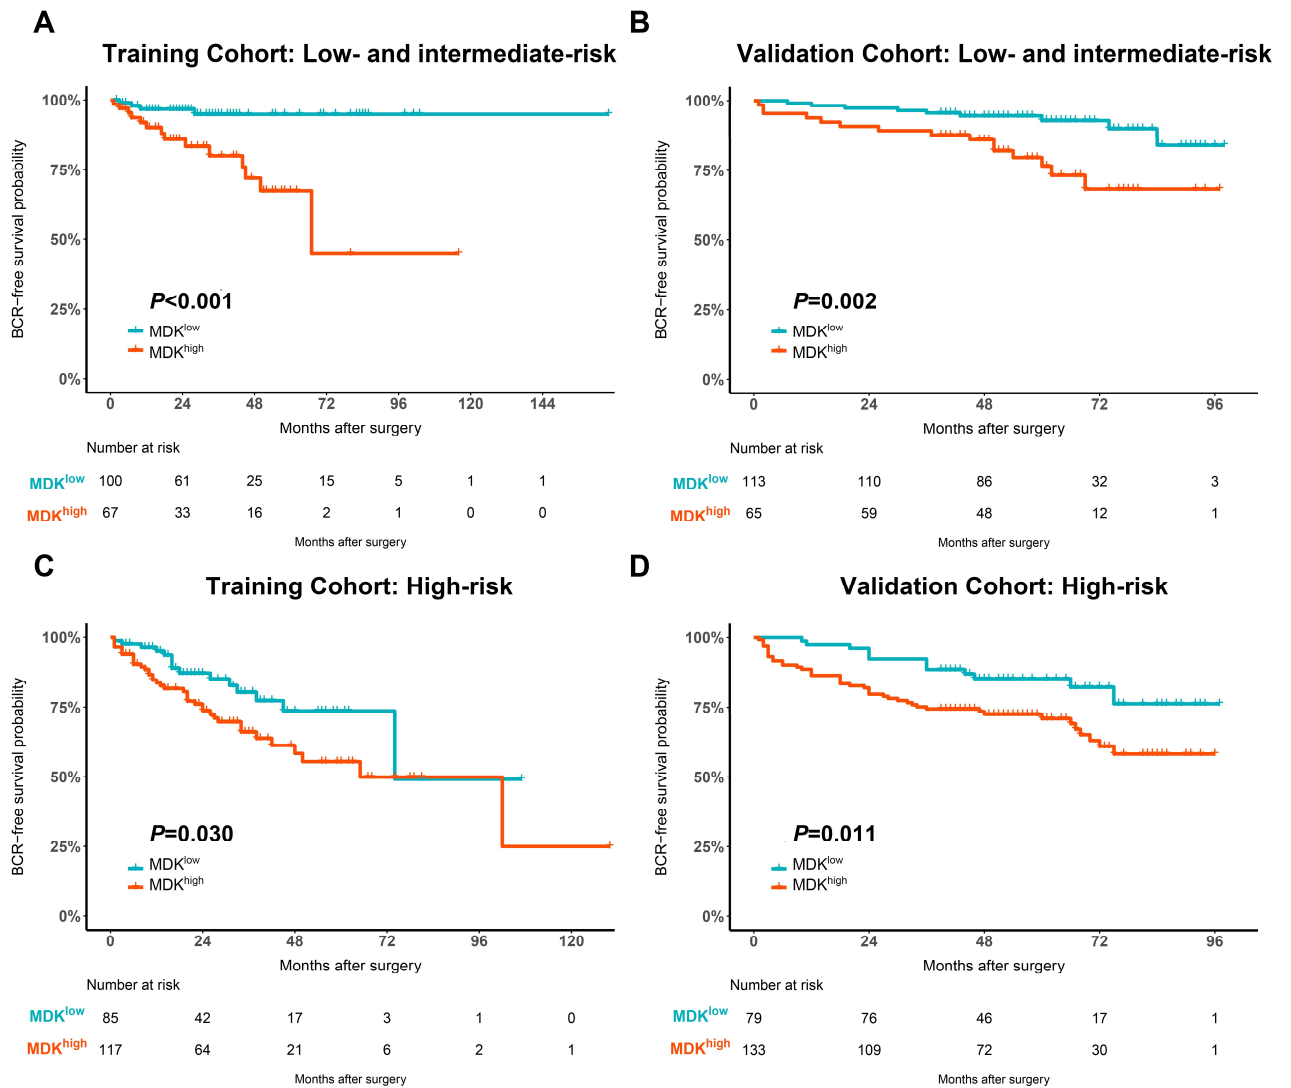

**Supplementary Figure 3. Intratumoral MDK expression was associated with poor prognosis in PCa with low- and intermediate-risk or high-risk subgroups.**

Kaplan-Meier curves for BCR-free survival comparing tumor with high vs. low intratumoral MDK expression in low- and intermediate-risk subgroups in training cohort (A) and validation cohort (B) or in high-risk subgroups in training cohort (C) and validation cohort (D). Log-rank P values were shown.

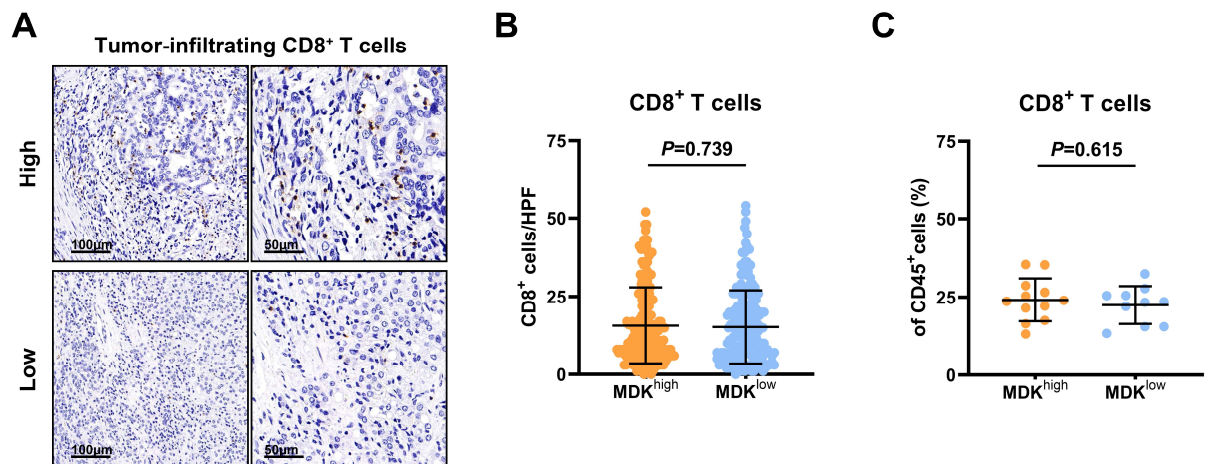

**Supplementary Figure 4. CD8<sup>+</sup> T cells infiltration in PCa with high/low intratumoral MDK expression.**

(A) Representative images showing the high/low infiltration of CD8<sup>+</sup> T cells in PCa.

(B) Evaluation of CD8<sup>+</sup> T cells in tumor with high vs. low MDK expression based on

IHC. (C) Evaluation of CD8<sup>+</sup> T cells among CD45<sup>+</sup> cells in tumor with high vs. low

MDK expression through flow cytometry. Data were analyzed with Mann-Whitney U test.



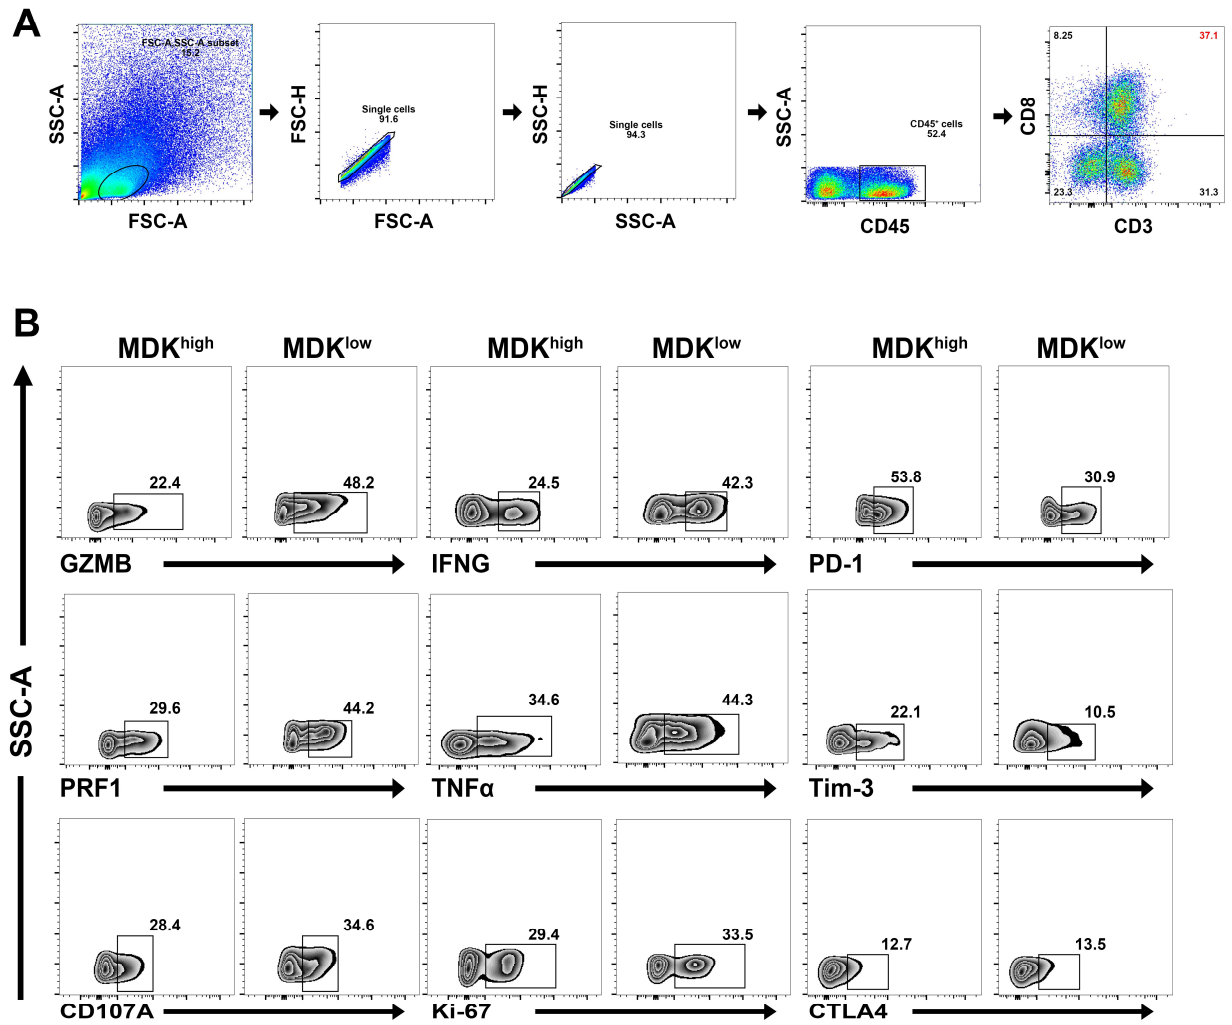

**Supplementary Figure 5. Gating strategy and representative flow cytometry**

**images for tumor-infiltrating CD8<sup>+</sup> T cell in PCa.**

(A) Gating strategy for selecting tumor-infiltrating CD8<sup>+</sup> T cell (CD45<sup>+</sup> CD3<sup>+</sup> CD8<sup>+</sup> cell)

in PCa. (B) Representative flow cytometry plots for cytotoxicity, effector, proliferative

and immune checkpoint molecules on CD8<sup>+</sup> T cells in high and low MDK expression

groups.

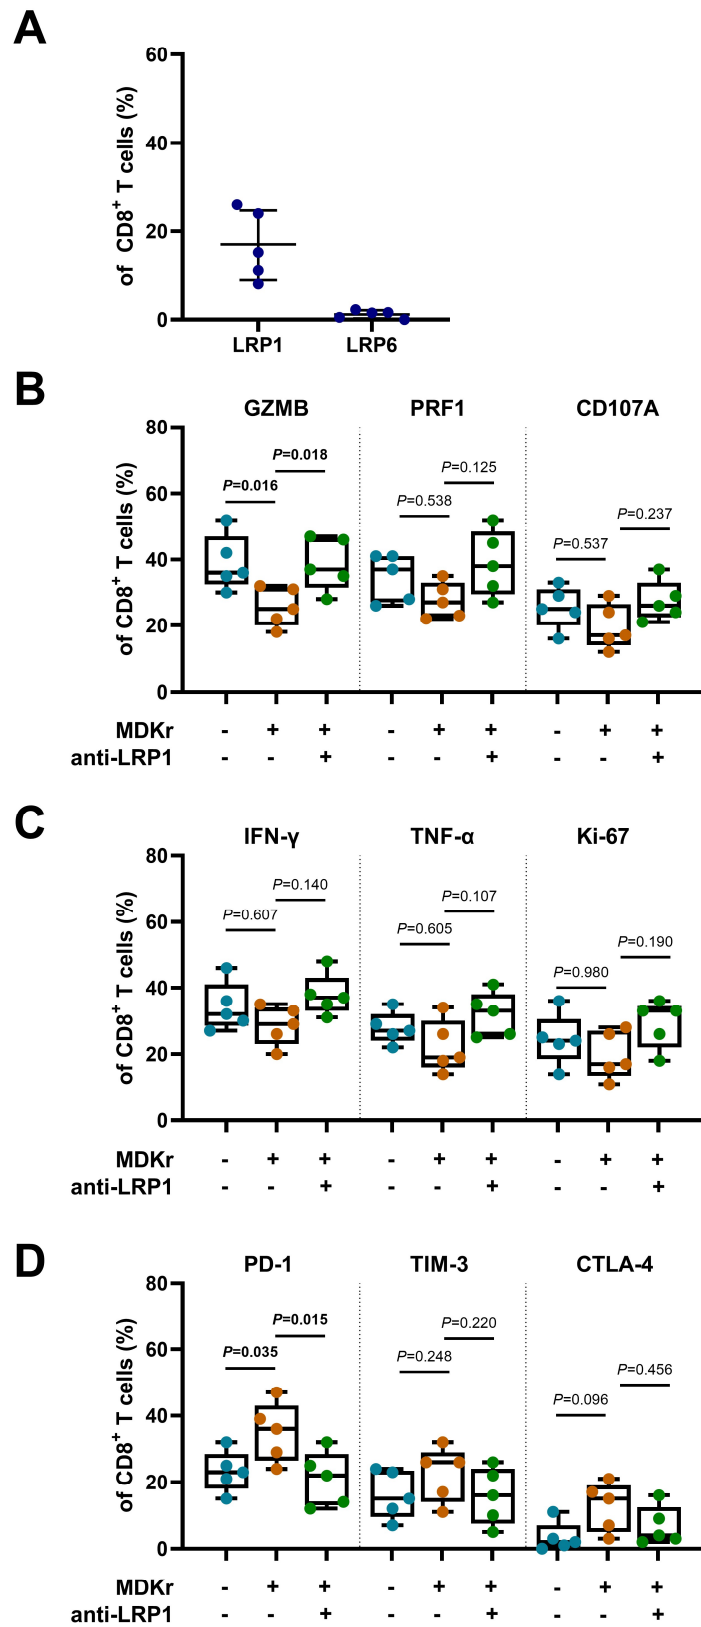

Supplementary Figure 6. MDK showed direct but faint immunosuppressive

**effect on CD8<sup>+</sup> T cells.**

(A) Evaluation of LRP1 and LRP6 expression on CD8<sup>+</sup> T cells isolated from PBMCs from patients with tumor (n=5). (B) Evaluation of cytotoxicity expression (GZMB, PRF1 and CD107A) of PBMC-isolated CD8<sup>+</sup> T cells treated with MDKr and anti-LRP1. (C) Evaluation of effector expression (IFNG and TNF- $\alpha$ ) and proliferative marker (Ki-67) of PBMC-isolated CD8<sup>+</sup> T cells treated with MDKr and anti-LRP1. (D) Evaluation of immune checkpoint (PD-1, Tim-3 and CTLA4) of PBMC-isolated CD8<sup>+</sup> T cells treated with MDKr and anti-LRP1. Data were analyzed with one-way ANOVA test with Bonferroni correction.

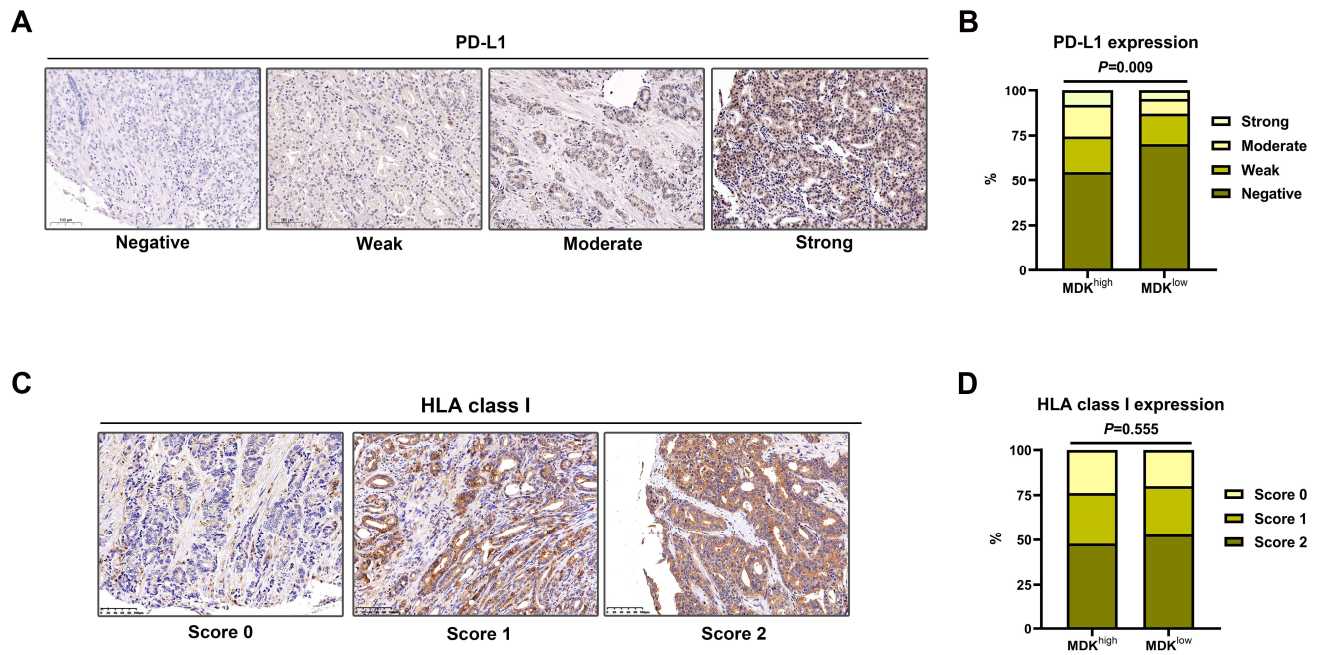

**Supplementary Figure 7. High expression of PD-L1 was observed in tumor with high intratumoral MDK expression.**

(A) Representative images of PD-L1 through IHC staining. (B) Evaluation of PD-L1 expression in tumor with high/low intratumoral MDK expression. (C) Representative images of HLA Class I through IHC staining. (D) Evaluation of HLA Class I expression in tumor with high/low intratumoral MDK expression. Data was analyzed by Chi-square test.

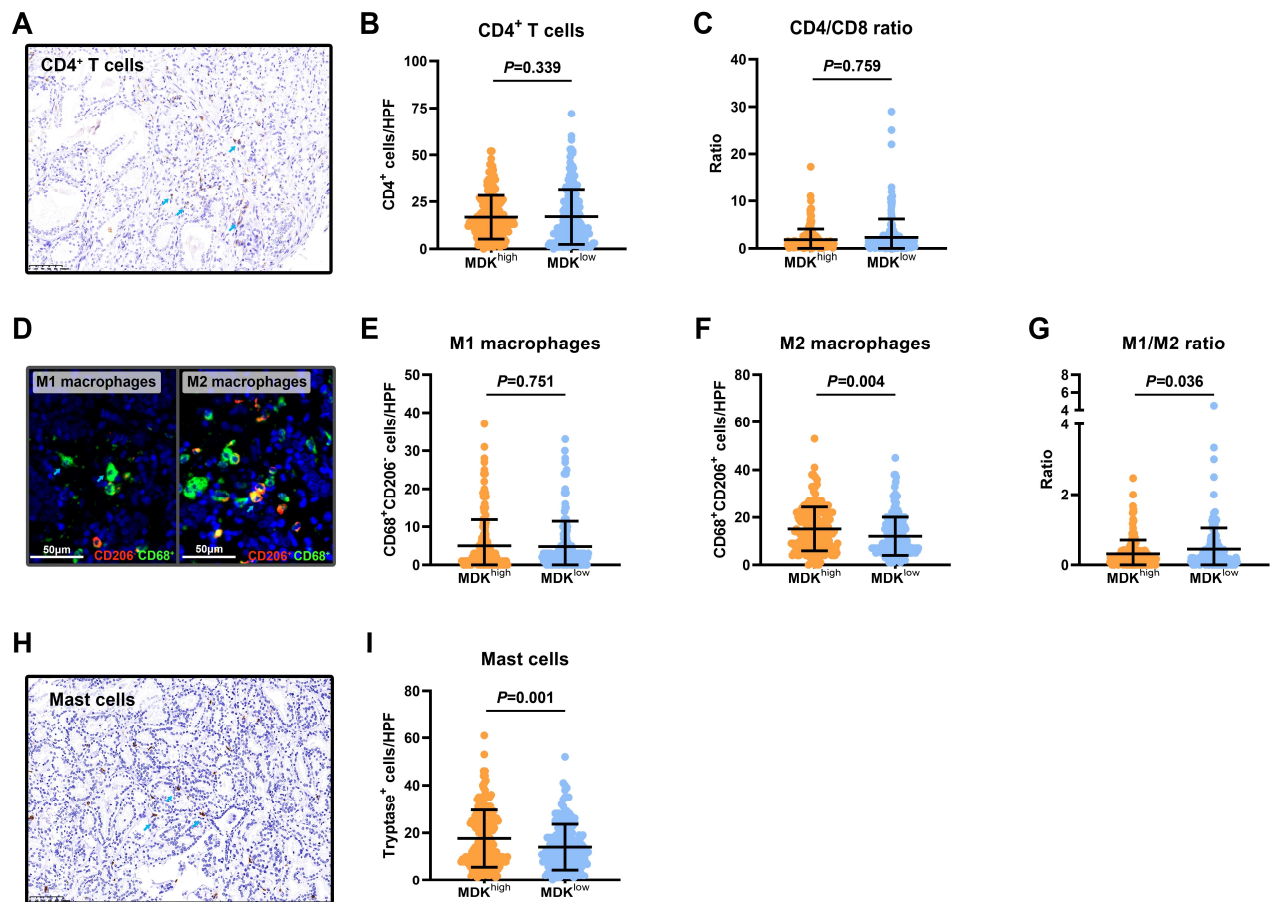

**Supplementary Figure 8. Tumor with high MDK expression featured with immunosuppressive immune contexture.**

(A) The representative image of CD4<sup>+</sup> T cells through IHC staining. (B-C) Evaluation of CD4<sup>+</sup> T cell infiltration (B) and CD4/CD8 ratio (C) between tumor with high vs. low MDK expression. (D) The representative image of M1 macrophages (CD68<sup>+</sup>CD206<sup>-</sup> cells) and M2 macrophages (CD68<sup>+</sup>CD206<sup>+</sup> cells) through immunofluorescence staining. (E-G) Evaluation of M1 macrophages (E) and M2 macrophages (F) infiltration and M1/M2 ratio (G) between tumor with high vs. low MDK expression. (H) The representative image of mast cells (Tryptase<sup>+</sup> cells) through IHC staining. (I) Evaluation of mast cells infiltration between tumor with high vs. low MDK expression. Data was analyzed by Mann-Whitney U test.

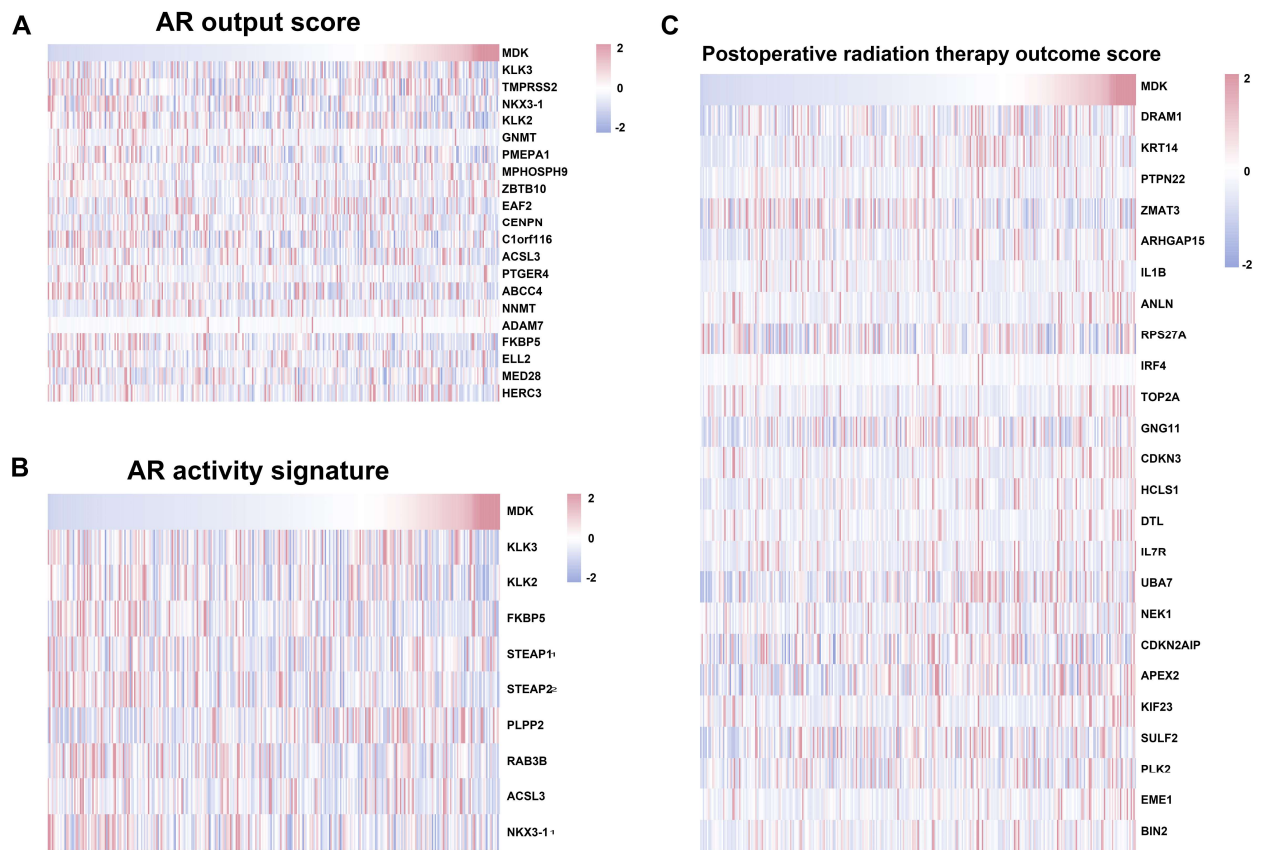

**Supplementary Figure 9. Heatmap of signatures associated with therapeutic response.**

Heatmap illustrating the MDK expression with AR output score (A), AR activity signature (B), postoperative radiation therapy outcome score (C) in external cohort (n=325).

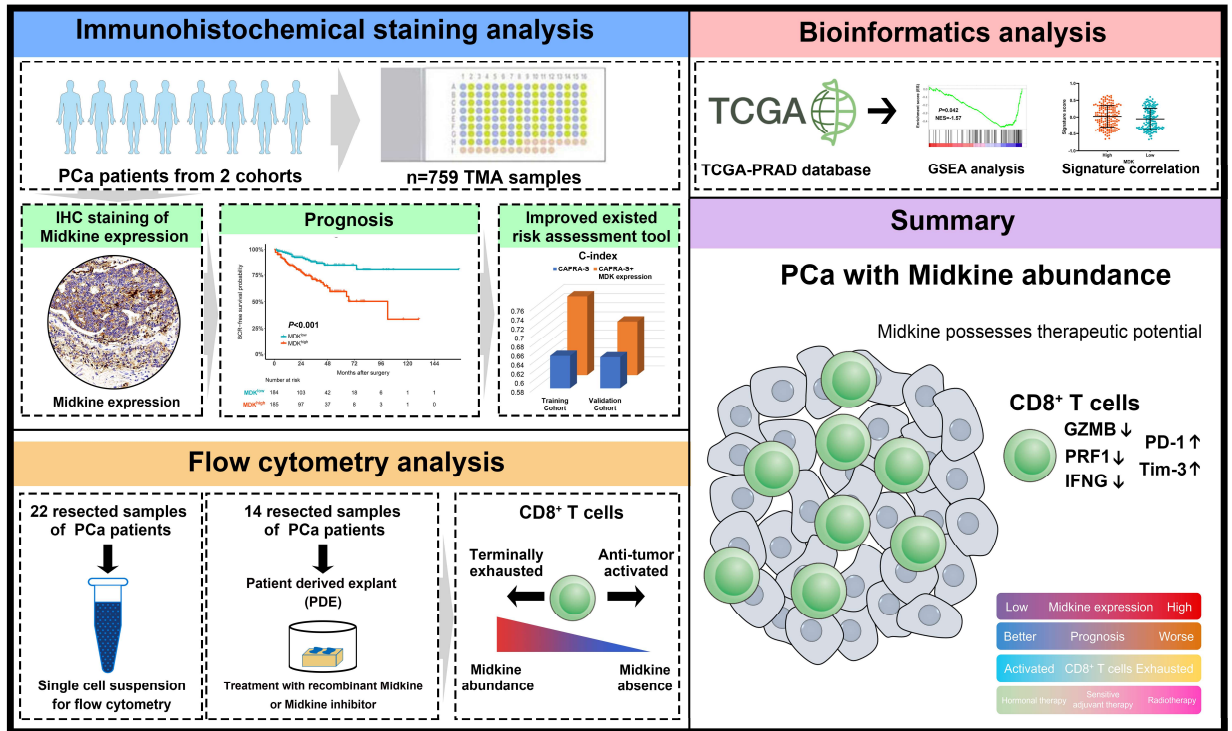

### Flow cytometry analysis

**22 resected samples of PCa patients**



**Single cell suspension for flow cytometry**

**14 resected samples of PCa patients**

**Patient derived explant (PDE)**



**Treatment with recombinant Midkine or Midkine inhibitor**

**CD8<sup>+</sup> T cells**

Terminally exhausted



Anti-tumor activated



**Midkine abundance** → **Midkine absence**

### Summary

## PCa with Midkine abundance

Midkine possesses therapeutic potential



**CD8<sup>+</sup> T cells**

GZMB ↓ PD-1 ↑

PRF1 ↓ Tim-3 ↑

IFNG ↓

|                  |                            |              |
|------------------|----------------------------|--------------|
| Low              | Midkine expression         | High         |
| Better           | Prognosis                  | Worse        |
| Activated        | CD8 <sup>+</sup> T cells   | Exhausted    |
| Hormonal therapy | Sensitive adjuvant therapy | Radiotherapy |

Supplementary Figure 10. Graphical abstract.

**Supplementary Table 1. Flow cytometry antibodies.**

| <b>No.</b> | <b>Marker</b> | <b>Dye</b> | <b>Antibody name</b>                     | <b>Clonality Species</b> | <b>Company</b>    | <b>Product No.</b> |
|------------|---------------|------------|------------------------------------------|--------------------------|-------------------|--------------------|
| <b>1</b>   | CD45          | APC-Cy7    | APC-Cy7 Mouse Anti-Human CD45            | Mouse Anti-human         | BD<br>Biosciences | 557833             |
| <b>2</b>   | CD8           | BB515      | BB515 Mouse Anti-Human CD8               | Mouse Anti-human         | BD<br>Biosciences | 564526             |
| <b>3</b>   | CD3           | BB515      | BB515 Mouse Anti-Human CD56              | Mouse Anti-human         | BD<br>Biosciences | 552852             |
| <b>4</b>   | TNF           | PE         | PE Mouse Anti-Human TNF                  | Mouse Anti-human         | BD<br>Biosciences | 559321             |
| <b>5</b>   | CD107A        | AF647      | AF647 Mouse Anti-Human CD107A            | Mouse Anti-human         | BD<br>Biosciences | 641581             |
| <b>6</b>   | IFN- $\gamma$ | PE-Cy7     | PE-Cy7 Mouse Anti-Human IFN- $\gamma$    | Mouse Anti-human         | BD<br>Biosciences | 557643             |
| <b>7</b>   | GZMB          | AF647      | AF647 Mouse anti-Human Granzyme B        | Mouse Anti-human         | BD<br>Biosciences | 560212             |
| <b>8</b>   | PRF-1         | PE         | PE Mouse Anti-Human Perforin             | Mouse Anti-human         | BD<br>Biosciences | 556437             |
| <b>9</b>   | Ki-67         | BV421      | BV421 Mouse Anti-Human Ki-67             | Mouse Anti-human         | BD<br>Biosciences | 562899             |
| <b>10</b>  | PD-1          | PE-Cy7     | PE-Cy7 Mouse Anti-Human PD-1             | Mouse Anti-human         | BD<br>Biosciences | 561272             |
| <b>11</b>  | Tim-3         | PE         | PE Mouse Anti-Human TIM-3 (CD366)        | Mouse Anti-human         | BD<br>Biosciences | 563422             |
| <b>12</b>  | PSMA          | APC        | APC Mouse Anti-Human PSMA Antibody       | Mouse Anti-human         | Biologend         | 342508             |
| <b>13</b>  | LRP1          | PE         | PE Mouse Anti-Human CD91 (LRP1) Antibody | Mouse Anti-human         | BD<br>Biosciences | 550497             |
| <b>14</b>  | LRP6          | AF647      | AF647 Mouse Anti-Human LRP6 Antibody     | Mouse Anti-human         | R&D<br>Systems    | FAB1505R           |



**Supplementary Table 2. Gene signature applied in this study**

| <b>Signature*</b>                                             | <b>Source</b>                                     | <b>Genes</b>                                                                                                                                                                                                                                                                                                                                                                                                                                                                                                                                                                                                                                                                                                                          |
|---------------------------------------------------------------|---------------------------------------------------|---------------------------------------------------------------------------------------------------------------------------------------------------------------------------------------------------------------------------------------------------------------------------------------------------------------------------------------------------------------------------------------------------------------------------------------------------------------------------------------------------------------------------------------------------------------------------------------------------------------------------------------------------------------------------------------------------------------------------------------|
| <b>Progenitor exhausted CD8<sup>+</sup> T cells signature</b> | DOI:<br>10.1038/s4159<br>0-019-0312-6             | <i>ARAP2, ASAP1, CD28, CD9, CRTAM, CXCL10, EEF1A1, EEF1B2, EEF1G, EHD3, EMB, EVL, FOSB, RPL35, GPR183, HIF1A, HSPE1, ICOS, ID3, IFIT3, IL7R, ITGB1, JUN, KCNN4, LIMD2, LTB, MIF, MS4A4A, MT-ATP6, MT-CO1, MT-CO2, MT-CO3, MT-CYB, MT-ND1, MT-ND2, MT-ND3, MT-ND4, MT-ND5, NACA, NEK7, NRP1, POU2F2, PTPN6, RILPL2, RNF213, RPL10A, RPL11, RPL13, RPL15, RPL22, RPL22L1, RPL23, RPL24, RPL26, RPL27A, RPL28, RPL29, RPL3, RPL30, RPL32, RPL34, RPL35, RPL35A, RPL36, RPL36A, RPL37, RPL4, RPL6, RPL7A, RPL8, RPLP0, RPLP1, RPLP2, RPS11, RPS14, RPS15, RPS15A, RPS16, RPS17, RPS18, RPS19, RPS2, RPS21, RPS27A, RPS28, RPS3A, RPS4X, RPS5, RPS6, RPS7, RPS8, RPS9, SLAMF6, SOCS3, TCF7, TNFSF8, TRAF1, USP18, WDR89, XCL2, ZFP36L1</i> |
| <b>Terminally exhausted CD8<sup>+</sup> T cells signature</b> | DOI:<br>10.1038/s4159<br>0-019-0312-6             | <i>KIAA1671, ABI3, AKNA, APOBEC3H, ARHGAP9, ARL6IP1, ARMC7, BCL2A1, CBX4, CCL18, CCL4, CD160, CD164, CD27, CD3E, CD3G, CD7, CD82, CD8A, CST7, CXCR6, DAPK2, DTX1, DUSP2, EFHD2, EIF4A2, FAM189B, FASLG, FOXP3, FYN, GIMAP1, GIMAP6, GIMAP7, GLRX, GNG2, GRAMD1A, GZMA, GZMH, GZMK, HCST, HSPA5, ID2, IFIT3, IL21R, ISG15, ITK, ITPKB, LAG3, LAX1, LRRK1, MBNL1, MXD4, NR4A2, PDCD1, PFDN5, PLAC8, PRDX5, PRKCH, PSMB10, PSMB8, PSME1, PTGER4, PTPN18, PTPN22, RGS1, RGS2, RGS3, RTP4, RUNX3, SERPINA3, SERPINB6, SH2D2A, SHISA5, SIPA1, SLC3A2, STAT1, STK17B, TAPBP, TAPBPL, TNFRSF1B, TOX, UCP2, VMP1, ZBP1</i>                                                                                                                     |
| <b>AR output score</b>                                        | DOI:<br>10.1016/j.cell.<br>2015.10.025            | <i>KLK3, TMPRSS2, NKX3-1, KLK2, GNMT, PMEPA1, MPHOSPH9, ZBTB10, EAF2, CENPN, C1orf116, ACSL3, PTGER4, ABCC4, NNMT, ADAM7, FKBP5, ELL2, MED28, HERC3</i>                                                                                                                                                                                                                                                                                                                                                                                                                                                                                                                                                                               |
| <b>AR activity signature</b>                                  | DOI:<br>10.1158/1078-<br>0432.CCR-19-<br>1587     | <i>KLK3, KLK2, FKBP5, STEAP1, STEAP2, PPAP2A, RAB3B, ACSL3, NKX3-1</i>                                                                                                                                                                                                                                                                                                                                                                                                                                                                                                                                                                                                                                                                |
| <b>Radiation Therapy Outcomes Score</b>                       | DOI:<br>10.1016/S147<br>0-<br>2045(16)3049<br>1-0 | <i>DRAM1, KRT14, PTPN22, ZMAT3, ARHGAP15, IL1B, ANLN, RPS27A, IRF4, TOP2A, GNG11, CDKN3, HCLS1, DTL, IL7R, UBA7, NEK1, CDKN2AIP, APEX2, KIF23, SULF2, PLK2, EME1, BIN2</i>                                                                                                                                                                                                                                                                                                                                                                                                                                                                                                                                                            |

**Supplementary Table 3. Univariate cox regression analyses of clinicopathological features associated with BCR-free survival.**

| Characteristics               | Training Cohort      |                  | Validation Cohort    |                  |
|-------------------------------|----------------------|------------------|----------------------|------------------|
|                               | HR (95% CI)          | <i>P</i>         | HR (95% CI)          | <i>P</i>         |
| Age, per 1-y increase         | 0.999 (0.995-1.002)  | 0.502            | 0.999 (0.964-1.035)  | 0.945            |
| Gleason score 7 vs. <7        | 2.709 (1.042-7.041)  | <b>0.041</b>     | 2.372 (1.059-5.316)  | <b>0.036</b>     |
| Gleason score 8-10 vs. <7     | 4.778 (1.879-12.149) | <b>0.001</b>     | 4.672 (2.072-10.531) | <b>&lt;0.001</b> |
| Preoperative PSA 10-20 vs <10 | 1.058 (0.573-1.955)  | 0.856            | 1.960 (1.015-3.785)  | <b>0.045</b>     |
| Preoperative PSA >20 vs <10   | 2.038 (1.166-3.560)  | <b>0.012</b>     | 3.138 (1.675-5.881)  | <b>&lt;0.001</b> |
| Lymph node involvement        | 3.265 (1.659-6.427)  | <b>0.001</b>     | 0.609 (0.085-4.380)  | 0.622            |
| Positive surgical margin      | 1.498 (0.820-2.739)  | 0.189            | 0.403 (0.056-2.904)  | 0.367            |
| Extracapsular extension       | 2.058 (0.983-4.305)  | 0.055            | 1.045 (0.565-1.931)  | 0.889            |
| Seminal vesicle invasion      | 1.910 (1.128-3.235)  | <b>0.016</b>     | 0.599 (0.147-2.438)  | 0.474            |
| Peritumor MDK expression      | 1.276 (0.800-2.035)  | 0.306            | 1.185 (0.763-1.842)  | 0.450            |
| Intratumor MDK expression     | 3.088 (1.837-5.194)  | <b>&lt;0.001</b> | 2.789 (1.707-4.557)  | <b>&lt;0.001</b> |

Abbreviations: CI, confidence interval; HR, hazard ratio; PSA, prostate specific antigen.

*P* value <0.05 marked in bold font shows statistical significance.

**Supplementary Table 4. CAPRA-S score of training and validation cohorts**

| <b>CAPRA-S score</b> | <b>Training Cohort (n=369)</b> |          | <b>Validation Cohort (n=390)</b> |          |
|----------------------|--------------------------------|----------|----------------------------------|----------|
|                      | <b>n</b>                       | <b>%</b> | <b>n</b>                         | <b>%</b> |
| <b>0</b>             | 14                             | 3.8      | 12                               | 3.1      |
| <b>1</b>             | 29                             | 7.9      | 31                               | 7.9      |
| <b>2</b>             | 65                             | 17.6     | 56                               | 14.4     |
| <b>3</b>             | 62                             | 16.8     | 80                               | 20.5     |
| <b>4</b>             | 47                             | 12.7     | 63                               | 16.2     |
| <b>5</b>             | 43                             | 11.7     | 58                               | 14.9     |
| <b>6</b>             | 45                             | 12.2     | 53                               | 13.6     |
| <b>7</b>             | 21                             | 5.7      | 18                               | 4.6      |
| <b>8</b>             | 23                             | 6.2      | 15                               | 3.8      |
| <b>9</b>             | 11                             | 3.0      | 1                                | 0.3      |
| <b>≥10</b>           | 9                              | 2.5      | 3                                | 0.8      |
